# Supplementary material
Source: Research Square preprint supplement (doi:10.21203/rs.3.rs-9030306/v1)
Supplement: Supplementary file 1 [file c08cbea10d909a9f5f88c0f9.docx]

Supplementary Table 1. Opioid Analgesic Conversion Table to Oral Morphine Milligram Equivalents

| Opioid Formulation | Conversion Factor |
| --- | --- |
| Common oral opioids |  |
| Oxycodone | 1.5 |
| Tramadol | 0.25 |
| Parenteral opioids |  |
| Dezocine | 1 |
| Meperidine | 0.2 |
| Transdermal opioids |  |
| Buprenorphine patch 5μg/hr | 250 for 1 day |

Supplementary Table 2. Univariate logistic regression analysis of risk factors for chronic postsurgical pain in adolescent idiopathic scoliosis patients

| **Univariate Analysis of Factors Influencing Chronic Pain** | | | |
| --- | --- | --- | --- |
| Variables | OR | CI | *P* value |
| Depressive symptoms  No  Yes | Reference  22.02 | Reference  8.42 ~ 57.56 | **<0.001** |
| Age | 1.11 | 0.91 ~ 1.35 | 0.299 |
| Gender  Males  Females | Reference  6.06 | Reference  1.76 ~ 20.94 | **0.004** |
| Education level | 2.07 | 0.92 ~ 4.63 | 0.078 |
| NYHA class | 0.84 | 0.09 ~ 7.72 | 0.874 |
| ASA class | 1741859.37 | 0.00 ~ Inf | 0.989 |
| BMI | 1.01 | 0.92 ~ 1.11 | 0.793 |
| MMSE | 0.89 | 0.72 ~ 1.10 | 0.278 |
| Preoperative pain(rest) | 1.46 | 1.08 ~ 1.98 | **0.014** |
| Preoperative pain(exercise) | 1.41 | 1.10 ~ 1.79 | **0.006** |
| SRS-22 | 0.92 | 0.89 ~ 0.96 | **<0.001** |
| PSQI | 1.31 | 1.08 ~ 1.59 | **0.006** |
| SF-36 | 0.96 | 0.93 ~ 0.98 | **0.001** |
| Postoperative length of stay (day) | 1.06 | 0.85 ~ 1.32 | 0.622 |
| Hct% | 0.89 | 0.80 ~ 0.99 | **0.028** |
| ALB g/L | 1.00 | 0.86 ~ 1.16 | 0.961 |
| GLU mmol/L | 1.01 | 0.63 ~ 1.61 | 0.978 |
| GFR ml/min | 0.99 | 0.99 ~ 1.00 | 0.212 |
| Surgical segment | 1.17 | 1.02 ~ 1.34 | **0.024** |
| Cobb | 0.99 | 0.97 ~ 1.01 | 0.373 |
| Surgical duration (min) | 1.00 | 0.99 ~ 1.01 | 0.903 |
| Anesthesia duration (min) | 1.00 | 0.99 ~ 1.01 | 0.817 |
| Blood loss (ml) | 1.00 | 1.00 ~ 1.00 | 0.838 |
| Urine (ml) | 1.00 | 1.00 ~ 1.00 | 0.986 |
| Infusion volume (ml) | 1.00 | 1.00 ~ 1.00 | 0.444 |
| MME | 1.00 | 0.97 ~ 1.03 | 0.857 |

Note: NYHA New York Heart Association Functional Classification, ASA American Society of Anesthesiologists, BMI Body mass index, MMSE Preoperative Mini-Mental State Examination, SRS-22 Preoperative Scoliosis Research Society-22, PSQI Preoperative Pittsburgh Sleep Quality Index, SF-36 Preoperative Short Form Survey-36, Hct Hematocrit, Alb Albumin, Glu Glucose, GFR Glomerular Filtration Rate, MME Morphine milligram equivalent. The bolded *P*-value indicates statistical significance.
